# Supplementary material for: Preparation of metal sulfide–polymer composite microspheres with patterned surface structures
Source: Royal Society of Chemistry journal article supplement (doi:10.1039/b314533f), 2004-01-01
Supplement: b314533f.doc [file b314533f.doc]

# Supplementary Information

Preparation of metal sulfide-polymer composite microspheres

with patterned surface structures

Yu Fang*, Chaoliang Bai and Ying Zhang

*School of Chemistry and Materials Science, Shaanxi Normal University, Xi’an 710062, P. R. China. Fax: 0086 29 5307025; Tel: 0086 29 5307534(L); E-mail: yfang@snnu.edu.cn.*

1. Formation of the patterned surface structures of the composite microspheres is a gradual process. As an example, Fig.1 shows the SEM image of the CuS-PNIPAM-MAA composite microspheres and their enlarged surface structure. In this case, the precipitation was lasted for only 5 min.

**Fig. 1** SEM images of CuS-PNIPAM-MAA composite microspheres (a, b) and high magnification image of part of the surface of the microspheres (c). The precipitation was lasted for 5 min.

**a**

**b**

**c**

1. The metal sulfides in the composites have been confirmed by -ray diffraction analysis. The XRD patterns of the composites are shown in Fig. 2.
2. The IR spectra of the two templates are shown in Fig. 3.
3. The contents of metal sulfides in the composites have been analyzed by TG analysis. The results are very close to the theoretical values.

**Fig. 3** Infrared spectra of (a) PNIPAM and (b) P(NIPAM-co-MAA)

b

a

2θ

**Fig. 2** XRD patterns of P(NIPAM-co-MAA) microgels (red) and its composite micro-spheres with Ag2S
